# Supplementary material for: Cobalt ferrite nanowhiskers as T2 MRI contrast agent
Source: Royal Society of Chemistry journal article supplement (doi:10.1039/c4ra11934g), 2015-01-01
Supplement: c4ra11934g1.pdf [file c4ra11934g1.pdf]

## Electronic Supporting Information

### Cobalt Ferrite Nanowhiskers as T<sub>2</sub> MRI Contrast agent

---

M. Ravichandran<sup>a</sup>, Goldie Oza<sup>b</sup>, S.Velumani<sup>a,b,g\*</sup>, Jose Tapia Ramirez<sup>c</sup>, Francisco Garcia-Sierra<sup>d</sup>, Norma Barragán Andrade<sup>d</sup>, Marco A.Garza-Navarro<sup>e</sup>, Domingo I.Garcia-Gutierrez<sup>e</sup>, Rafael Lara-Estrada<sup>f</sup>, Emilio Sacristán-Rock<sup>f</sup> and Junsin Yi<sup>g</sup>

<sup>a</sup>Program on Nanoscience and Nanotechnology, <sup>b</sup>Department of Electrical Engineering (SEES), <sup>c</sup>Department of Genetics and Molecular Biology, <sup>d</sup>Department of Cell Biology, CINVESTAV-IPN, Avenida IPN 6508, San Pedro Zacatenco, Mexico D.F, <sup>e</sup>Universidad Autónoma de Nuevo León, UANL, CIIDIT, Nuevo León, México. <sup>f</sup>Department of Electrical Engineering, Centro Nacional de Investigación en Imagenología e Instrumentación Médica(CI<sup>3</sup>M), Universidad Autónoma Metropolitana-Iztapalapa(UAM-I), <sup>g</sup>School of Information and Communication Engineering, Sungkyunkwan University, 300 Cheoncheon-Dong, Jangan-Gu, Suwon, Korea.

\*Corresponding author: velu\_LANE@yahoo.com

---

#### Table of Contents

|                             |     |
|-----------------------------|-----|
| Materials                   | 1   |
| Characterization            | 1   |
| Zeta Potential measurements | 1   |
| MRI parameters              | 1   |
| Phantom preparation         | 1   |
| Cell Culturing technique    | 1   |
| Results                     | 2,3 |

#### 1.0 Materials

The chemical reagents used in the work were ferric chloride (FeCl<sub>3</sub>•6H<sub>2</sub>O), Cobalt (II) nitrate hexahydrate (CoN<sub>2</sub>O<sub>6</sub>• 6H<sub>2</sub>O), sodium hydroxide (NaOH) and Hydrochloric acid (HCl). All the chemicals were of analytical grade purchased from sigma Aldrich and were directly used without any further purification.

#### 2.0 Characterization

The products were characterized and the structure of the nanowhiskers were determined from High resolution transmission electron microscope (HRTEM) (JEOL, JEM-ARM200F) and X-ray diffractometer (XRD) (PAN analytical, X'Pert Powder) using a Cu K $\alpha$  radiation ( $\lambda=1.5406$  Å). The magnetic studies were conducted on a superconducting quantum interference device (SQUID), (Quantum Design, MPMS SQUID-VSM). The zeta potential ( $\zeta$ ) of CfW in water, PBS and DMEM-FBS medium were measured with Zetasizer Nano ZS90 (Malvern instruments) at a wavelength of 633 nm with a 4.0 mW, solid-state He-Ne laser at a scattering angle of 90° at 25°C. Zeiss LSM 700 confocal microscope equipped with a 63X (N.A. 1.2) oil-immersion lens was used for collecting confocal z-series images. Images were processed with Zen 2012 Software.

#### 3.0 Zeta potential measurements

To carry out zeta potential measurements, 700 $\mu$ l of solution was placed in a quartz cuvette for analysis. The sample was analysed continuously for 7 days to measure the zeta potential and hydrodynamic diameter in various mediums and also the stability of CfW in all 3 mediums by varying different pH 1-12 was determined as a function of the equilibrium pH using a universal zeta dip cell. The pH of these solutions was adjusted before the analysis process between 1 and 12 using pH meter.

#### 4.0 MRI parameters

MRI experiments were performed with a 7T clinical Signa HDxt scanner (Varian). T<sub>2</sub>-weighted images were acquired using the following parameters: 7 T, Repetition time TR = 2000 ms, Echo time TE = 15-250ms, FOV = 3\*3cm, resolution 256  $\times$  256 points and slice thickness = 4mm. And for T<sub>1</sub> measurements coronal spin-echo sequences with fixed echo time (TE) = 24 ms and varying repetition time (TR) (25 ms to 4 s) were used.

#### 5.0 Phantom preparation

A pellet containing CfW labelled cells was mixed with 1.5ml of 0.5% agarose gel heated at 40°C. Then the CfW labeled cells are mixed with agar phantom and cooled at 4°C.

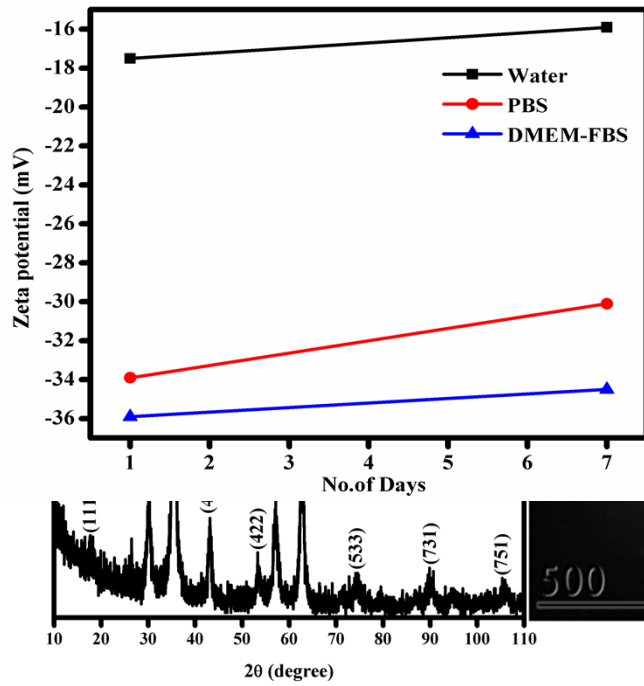

### 6.0 Cell culturing techniques

For MTT assay, L6 cells were grown in 35mm sterile cell culture petri dishes to approximately 70% confluency in CO<sub>2</sub> incubator.

### 7.0 Results

**Fig.S1a)** XRD pattern & b) SAED pattern of CfW

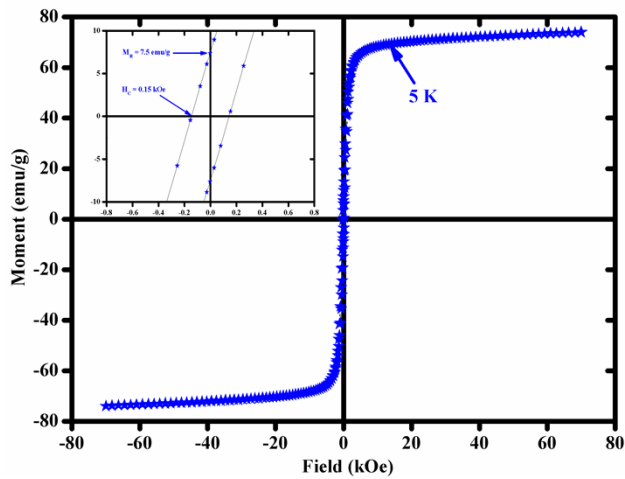

**Fig.S2** Variation of magnetization with applied magnetic field for the CfW at temperature 5K

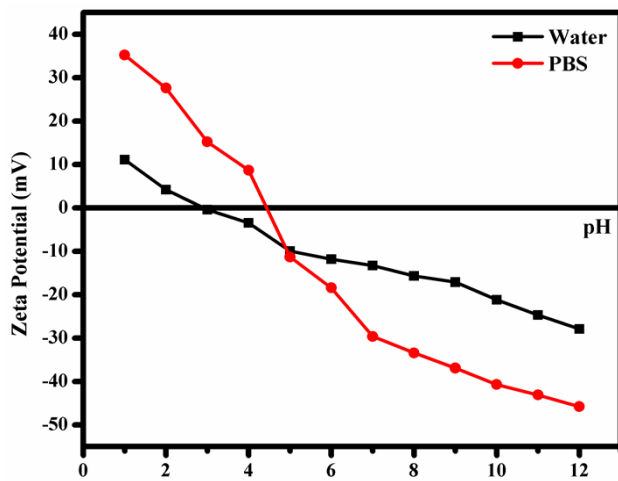

**Fig.S3** Stability of CfW in Water and PBS at various pH 1-12

**Fig.S4** Zeta potential of CfW in various mediums

**Table 1** Value of Zeta potential ( $\zeta$ ) and IEP of CfW dispersed in distilled H<sub>2</sub>O, PBS and DMEM-2%FBS

| <b>Samples</b>             | <b>Zeta potential<br/>pH=7.4 (mV)</b> | <b>IEP</b> |
|----------------------------|---------------------------------------|------------|
| Distilled H <sub>2</sub> O | -11.8                                 | 2.8        |
| PBS                        | -29.6                                 | 4.4        |
| DMEM-2%FBS                 | -35.9                                 | -          |
